# Supplementary material for: Impact of Investigator Initiated Trials and Industry Sponsored Trials on Medical Practice (Impact): Results of a Cohort Study
Source: Research Square preprint supplement (doi:10.21203/rs.3.rs-106925/v1), 2020-11-18
Supplement: Supplementary file 1 [file 1dee9d9ecd8bfc7f2d699b20.docx]

Additional file 6: Number of published articles cited by systematic reviews and/or by clinical guidelines per sub-cohort and type of publication

| **Trials cited by SR** | IIT  Public Germany gov  No. of articles (%) | IIT  Public Germany  other  No. of articles (%) | **IIT**  **Public Germany**  **No. of articles (%)** | **IIT**  **Public International**  **No. of articles (%)** | **IST**  **Commercial Germany**  **No. of articles (%)** | **IST**  **Commercial International**  **No. of articles (%)** | **Total**  **No. of articles**  **(%)** |
| --- | --- | --- | --- | --- | --- | --- | --- |
| **Total number of trials** | 60 | 60 | 120 | 200 | 171 | 200 | 691 |
| **Journal articles included in reviews** |  |  |  |  |  |  |  |
| Method articles (total, n=104) | 25 (24) | 7 (7) | 32 (31) | 31 (30) | 5 (5) | 2 (2) | 70 (67) |
| Result articles (n=843) | 66 (8) | 43 (5) | 109 (13) | 190 (23) | 125 (15) | 105 (12) | 529 (63) |
| Journal articles total (n=947) | 91 (10) | 50 (5) | 141 (15) | 221 (23) | 130 (14) | 107 (11) | 599 (63) |
| **Publications included in guidelines** |  |  |  |  |  |  |  |
| **Journal articles** |  |  |  |  |  |  |  |
| Method articles (n=104) | 2 (2) | 10 (10) | 12 (12) | 11 (11) | 2 (2) | 1 (1) | 26 (25) |
| Result articles (n=843) | 12 (1) | 28 (3) | 40 (5) | 76 (9) | 55 (7) | 43 (5) | 214 (25) |
| Journal articles total (n=947) | 14 (1) | 38 (4) | 52 (5) | 87 (9) | 57 (6) | 44 (5) | 240 (25) |
| **Reviews** |  |  |  |  |  |  |  |
| (n=2631) | 42 | 23 | 65 | 110 | 69 | 67 | 286 (11)* |

* The sum of the reviews in the sub-cohorts is higher than the total number of reviews, because one systematic review can cite published articles from more than one sub-cohort.
