# Supplementary material for: Impact of Investigator Initiated Trials and Industry Sponsored Trials on Medical Practice (Impact): Results of a Cohort Study
Source: Research Square preprint supplement (doi:10.21203/rs.3.rs-106925/v1), 2020-11-18
Supplement: Supplementary file 2 [file 48b29dab43de9832344f9203.docx]

Additional file 1: Sources where published articles were identified

Number of publications identified in biomedical databases and other sources by using an incremental search strategy from 1. to 9. * including PubMed tools “Similar articles“ and “Cited by“.

Of the 947 identified published journal articles, a great proportion (894; 94%) was identified in three sources only: the references of more than half (541; 57%) of the identified articles were reported in the study registries, additional 276 (29%) were found via PubMed, and a Google Scholar search revealed another 77 (8%) articles. The incremental benefit of the other databases was marginal. The remaining 53 articles were identified in the Cochrane Library (17), Livivo (3), via Google (10), Web of Science (10), study websites (4) and PubMed tools "Similar articles" and "Cited by" and reference lists (9).

It must be emphasized that the proportion of identified articles in each source strongly depends on the sequence the sources were searched, as the article was assigned to the source were it was found first.
