# Supplementary material for: Impact of Investigator Initiated Trials and Industry Sponsored Trials on Medical Practice (Impact): Results of a Cohort Study
Source: Research Square preprint supplement (doi:10.21203/rs.3.rs-106925/v1), 2020-11-18
Supplement: Supplementary file 2 [file 533f635e152faf6eb5511bb2.docx]

Additional file 3: Publication frequency: Proportion of trials (total: n=472) with n published method and results articles (total: n=947)

1

2

3

4

> 4

Number of published journal articles:
