# Supplementary material for: Impact of Investigator Initiated Trials and Industry Sponsored Trials on Medical Practice (Impact): Results of a Cohort Study
Source: Research Square preprint supplement (doi:10.21203/rs.3.rs-106925/v1), 2020-11-18
Supplement: Supplementary file 4 [file c4661f5b3e7e4ae7ea1738cc.docx]

Additional file 5: Medical Fields

| **Medical Fields** | **Total number of trials** | **Number of published trials (%)** | **Percent of published trials per medical field** | **95 % CI** |
| --- | --- | --- | --- | --- |
| Surgery | 104 | 64 | 62 | 0.515-0.709 |
| Psychiatry and Psychotherapy | 86 | 72 | 84 | 0.742-0.908 |
| Cardiovascular disease | 58 | 43 | 74 | 0.610-0.848 |
| Endocrinology, diabetes, and metabolism | 41 | 29 | 71 | 0.545-0.839 |
| Ophthalmology | 41 | 10 | 24 | 0.124-0.403 |
| Respiratory System | 40 | 30 | 75 | 0.588-0.873 |
| Neurology | 39 | 34 | 87 | 0.726-0.957 |
| Paediatric and Juenile Medicine | 37 | 26 | 70 | 0.530-0.841 |
| Hematology / oncology | 34 | 25 | 74 | 0.556-0.871 |
| Gynaecology and Obstetrics, Gynaecological Endocrinology and Reproductive Medicine | 29 | 23 | 79 | 0.603-0.920 |
| Dermatological and Venereal Diseases | 28 | 17 | 61 | 0.406-0.785 |
| Infectious disease | 25 | 18 | 72 | 0.506-0.879 |
| Physical and Rehabilitative Medicine | 24 | 16 | 67 | 0.447-0.844 |
| Nephrology/Urology | 24 | 11 | 46 | 0.256-0.672 |
| Gastro-intestinal | 18 | 12 | 67 | 0.410-0.867 |
| Family medicine | 13 | 7 | 54 | 0.251-0.808 |
| Orthopaedics | 12 | 5 | 42 | 0.152-0.723 |
| Rheumatology | 11 | 7 | 64 | 0.308-0.891 |
| Dentistry | 10 | 7 | 70 | 0.348-0.933 |
| Otorhinolaryngology | 8 | 3 | 38 | 0.085-0.755 |
| Allergy & Immunology | 5 | 4 | 80 | 0.284-0.995 |
| Pathology | 2 | 2 | 100 | 0.158*-1.000 |
| Anaesthesiology | 2 | 1 | 50 | 0.013-0.987 |
| Total | 691 | 472 | 68 | 0.647-0.7176 |

*One-sided 97.5% confidence interval.

For each trial, we determined the medical field according to the slightly modified version of the medical fields specified in the “(Model) Specialty Training Regulations 2003” of the German Medical Association.
